# Supplementary material for: Loss of Agouti-Related Peptide Does Not Significantly Impact the Phenotype of Murine POMC Deficiency
Source: PubMed Central journal article supplement — Endocrinology. 2011 Mar 1;152(5):1819–28. doi: 10.1210/en.2010-1450 (PMC3137464; doi:10.1210/en.2010-1450), 2011-03-01
Supplement: supp_en.2010-1450_en-10-1450_figs_1_to_5.pdf [file supp_en.2010-1450_en-10-1450_figs_1_to_5.pdf]

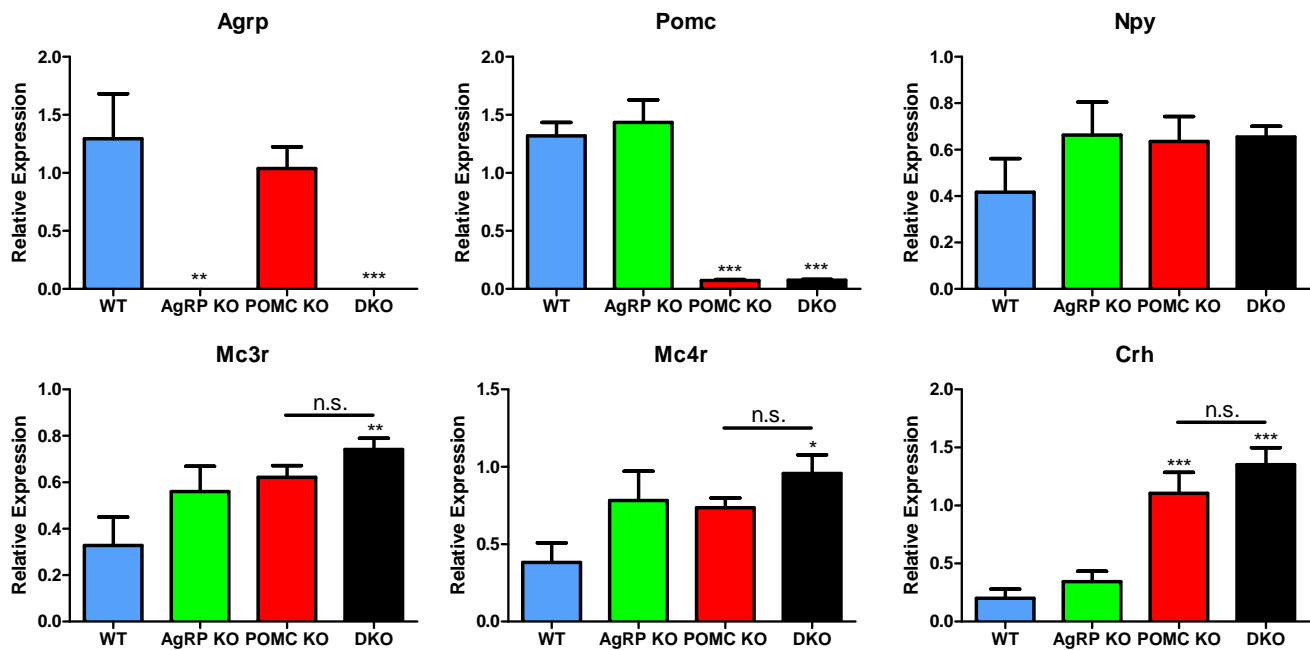

**Supplemental Figure 1: Hypothalamic mRNA expression of key neuropeptides and receptors in DKO mice.** Expression of *Agrp*, *Pomc*, *Npy*, *Mc3r*, *Mc4r*, and *Crh* as determined by RT-qPCR of whole hypothalamic blocks of male mice. Data normalised to beta-actin (*Actb*) expression and expressed as mean±SEM. \*p<0.05, \*\*p<0.01, \*\*\*p<0.001 vs wild-type mice. Abbreviations: n.s., not significant. WT (*Pomc*<sup>+/+</sup>/*Agrp*<sup>+/+</sup>) n=9, AgRP KO (*Pomc*<sup>+/+</sup>/*Agrp*<sup>-/-</sup>) n=8, POMC KO (*Pomc*<sup>-/-</sup>/*Agrp*<sup>+/+</sup>) n=9, DKO (*Pomc*<sup>-/-</sup>/*Agrp*<sup>-/-</sup>) n=11.

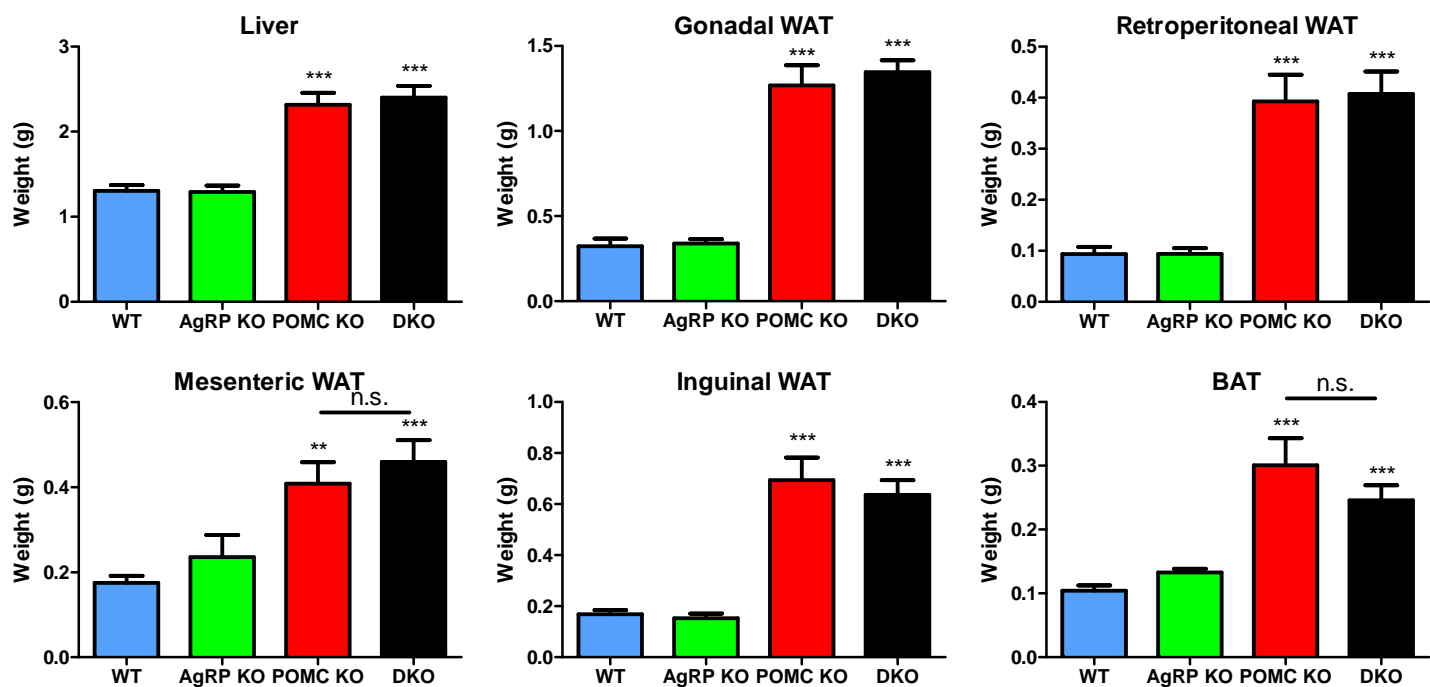

**Supplemental Figure 2: Adipose depots of DKO mouse.** Adipose depot weights as determined by dissection of 4-5 month old male mice. Abbreviations: White adipose tissue, WAT; Brown adipose tissue, BAT. Data represents mean±SEM. \*\*p<0.01, \*\*\*p<0.001 vs WT mice. WT (*Pomc*<sup>+/+</sup>/*AgRP*<sup>+/+</sup>) n=9, AgRP KO (*Pomc*<sup>+/+</sup>/*AgRP*<sup>-/-</sup>) n=8, POMC KO (*Pomc*<sup>-/-</sup>/*AgRP*<sup>+/+</sup>) n=9, DKO (*Pomc*<sup>-/-</sup>/*AgRP*<sup>-/-</sup>) n=11.

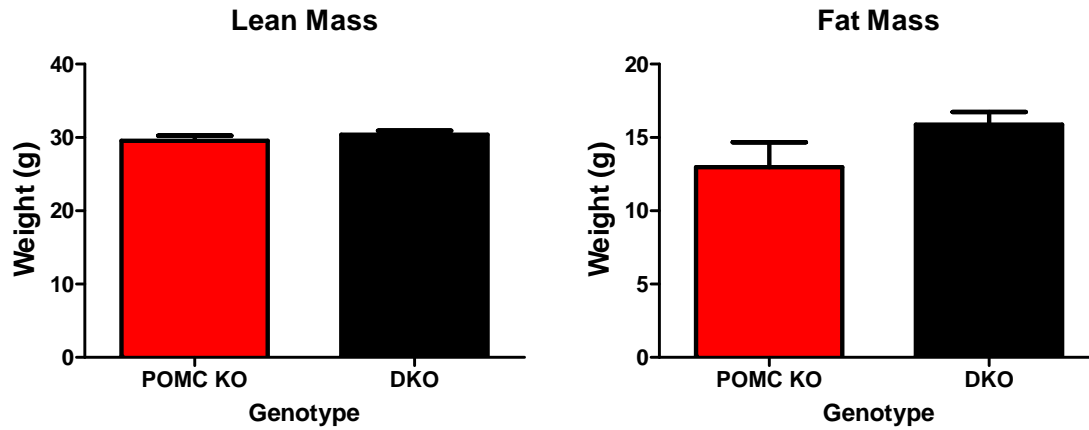

**Supplemental Figure 3: Late-onset phenotype of DKO mice.** Body composition of male mice aged 6-7 months as determined by dual-energy x-ray absorptiometry (DEXA). Data represents mean  $\pm$  SEM. POMC KO (*Pomc*<sup>-/-</sup>/*Agrp*<sup>+/+</sup>) n=7, DKO (*Pomc*<sup>-/-</sup>/*Agrp*<sup>-/-</sup>) n=15.

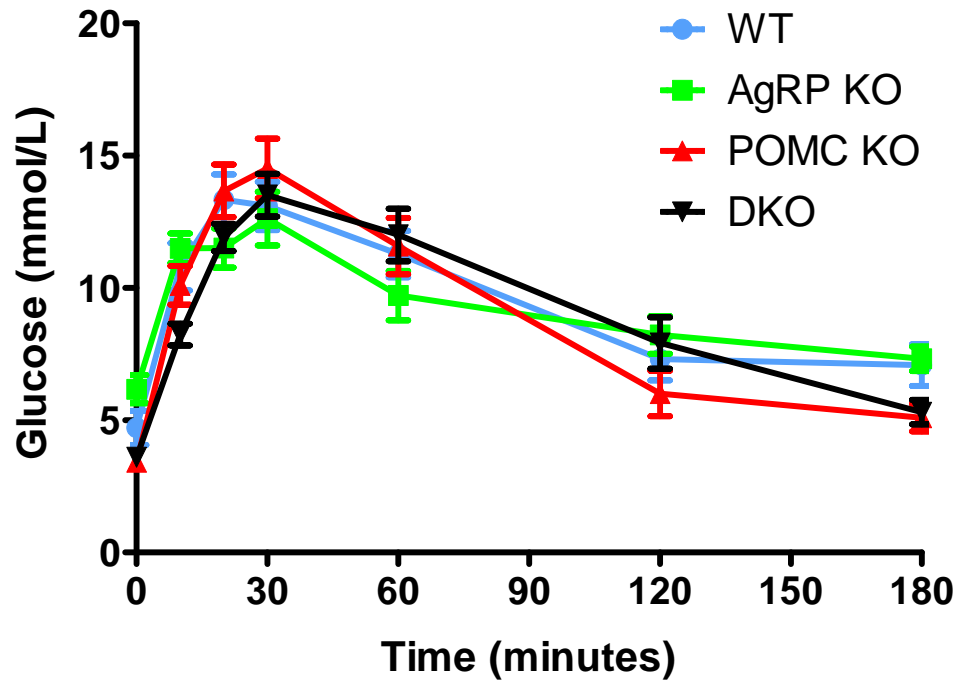

**Supplemental Figure 4: Glucose homeostasis of DKO mice.** Glucose homeostasis as determined by an intra-peritoneal glucose tolerance test. Data represents mean  $\pm$  SEM. WT (*Pomc*<sup>+/+</sup>/*Agrp*<sup>+/+</sup>) n=9, AgRP KO (*Pomc*<sup>+/+</sup>/*Agrp*<sup>-/-</sup>) n=8, POMC KO (*Pomc*<sup>-/-</sup>/*Agrp*<sup>+/+</sup>) n=9, DKO (*Pomc*<sup>-/-</sup>/*Agrp*<sup>-/-</sup>) n=11.

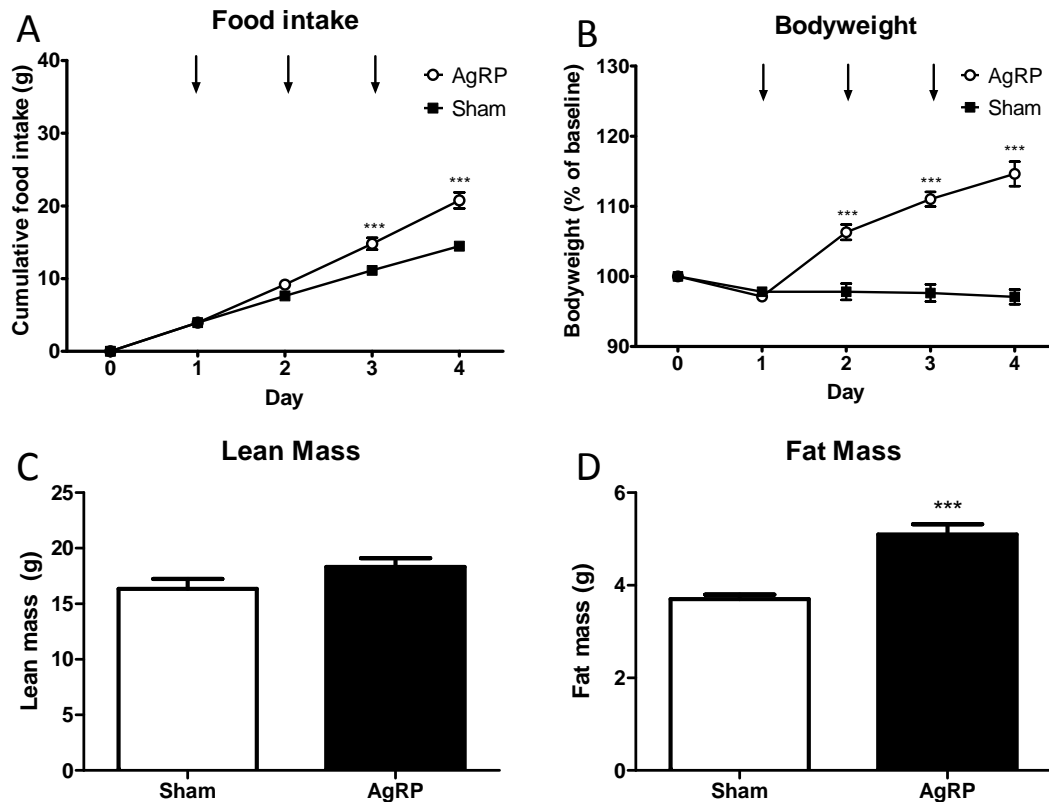

**Supplemental Figure 5: Central administration of AgRP to wild-type mice.** (A) Cumulative food intake, (B) body weight, (C) lean mass and (D) fat mass of 10-16 week old wild-type female mice following icv administration of 2nmol AgRP or saline. Data represents mean $\pm$ SEM for food intake and mean body weight as percentage of baseline  $\pm$ SEM. \*\*\* $p$ <0.001 vs control treated mice. AgRP n=8, control n=6
